# Supplementary material for: Vasoactive intestinal peptide promotes secretory differentiation and mitigates radiation-induced intestinal injury
Source: PubMed Central journal article supplement (PMC11462795; doi:10.1186/s13287-024-03958-z), 2024-10-08
Supplement: 13287_2024_3958_MOESM1_ESM.pdf [file 13287_2024_3958_MOESM1_ESM.pdf]

## Figure S1

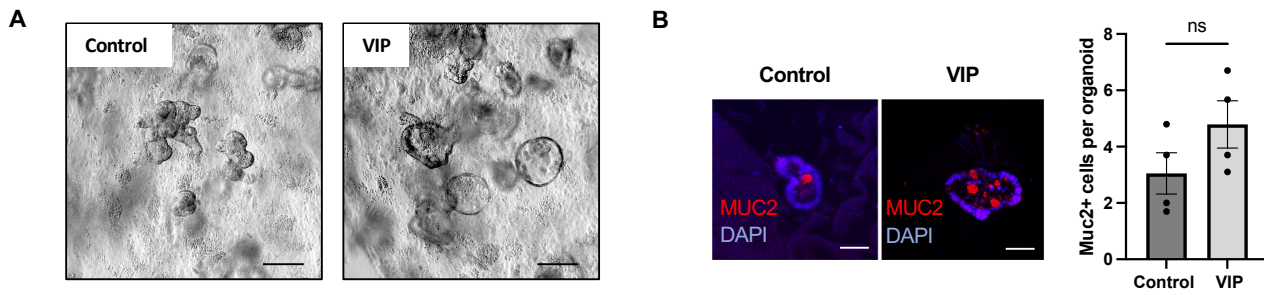

**Figure S1. VIP mediates organoid growth and secretory differentiation.** **A**, Representative images of control and VIP-treated organoids on day 5 post-plating (Scale bars=100  $\mu\text{m}$ ). **B**, Immunofluorescent analysis of MUC2 staining in control and VIP-treated organoids (Scale bars=50  $\mu\text{m}$ ).  $n=4$  (Control),  $n=4$  (VIP). Data are shown as means  $\pm$  SEM,  $n$  = number of biological replicates. Statistical analysis was performed by paired Student's t-test in.

## Figure S2

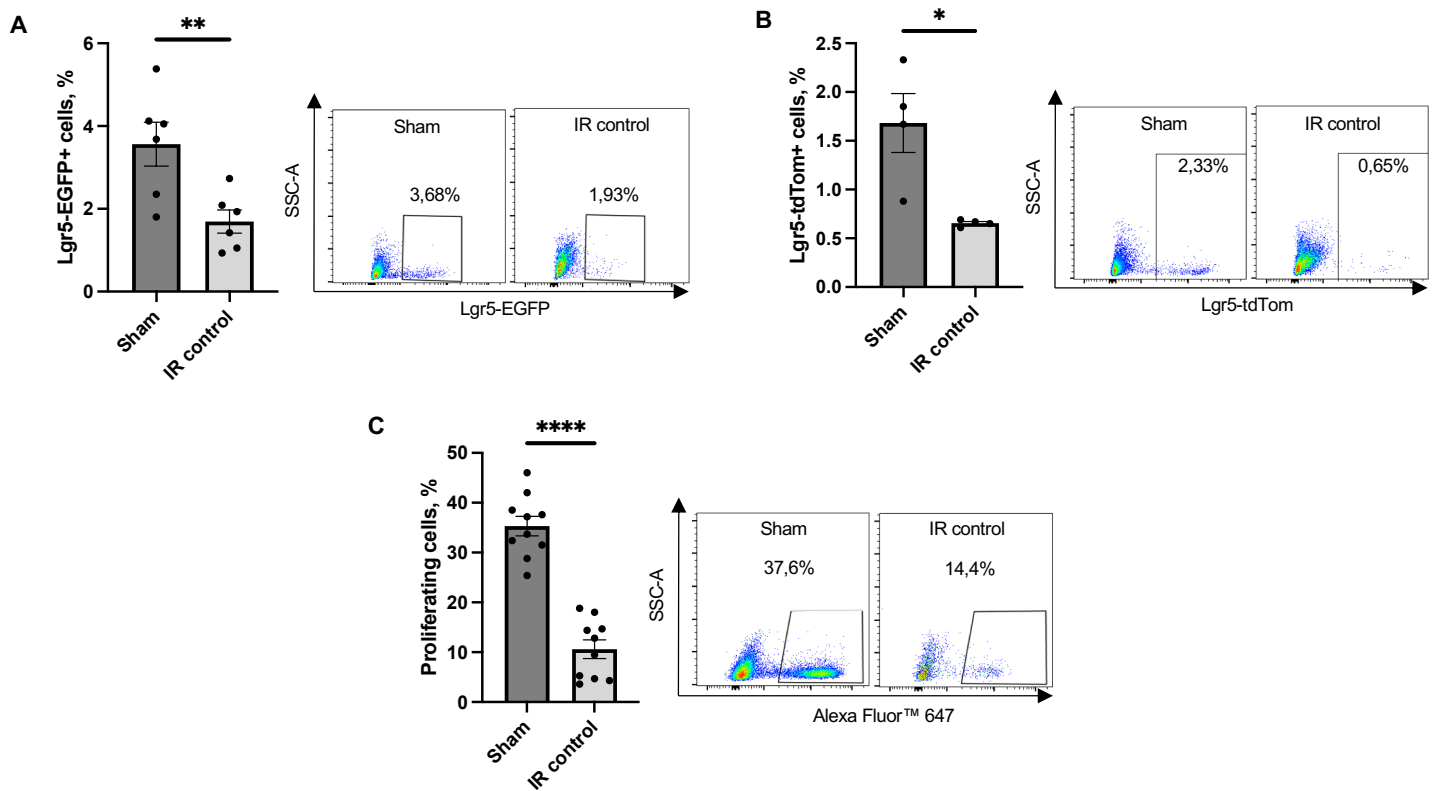

**Figure S2. Irradiation disturbs Lgr5-EGFP+ cell proliferation in intestinal organoids.** **A**, Flow cytometry analysis of Lgr5-EGFP+ cell number in sham-irradiated and irradiated organoids.  $n=6$  per group. **B**, Flow cytometry analysis of Lgr5-EGFP+ cell progeny in sham-irradiated and irradiated organoids.  $n=4$  per group. **C**, Analysis of cell proliferation in sham-irradiated and irradiated organoids determined by EdU assay.  $n=10$  per group.  $*p < 0.05$ ,  $**p < 0.01$ ,  $***p < 0.001$ ,  $****p < 0.0001$ . Data are shown as means  $\pm$  SEM,  $n$  = number of biological replicates. Statistical analysis was performed by paired Student's t-test.

## Figure S3

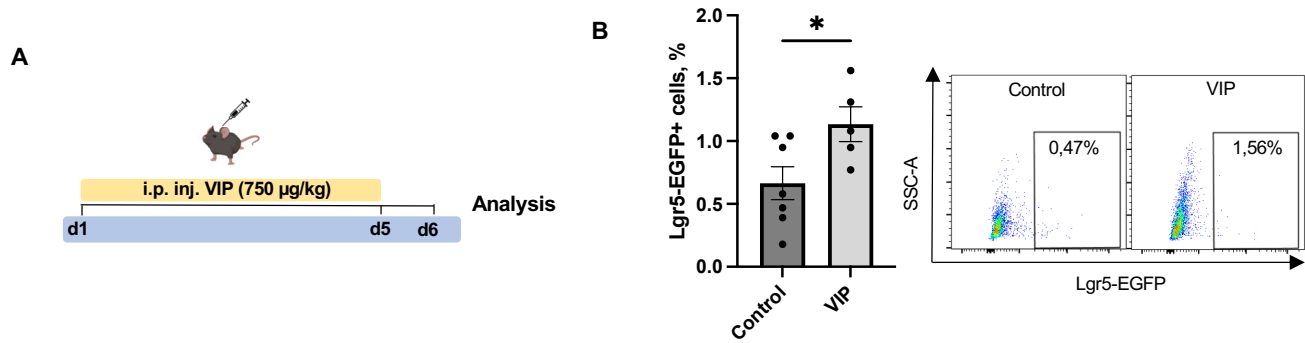

**Figure S3. VIP mediated expansion on Lgr5-EGFP+ progenitor cells *in vivo*.** **A**, Experimental outline and treatment scheme for administration of VIP in mice. **B**, Flow cytometry analysis of LGR5-EGFP+ progenitor cell number in jejunal crypts of mice treated with VIP. n=7 (Control), n=5 (VIP). \* $p < 0.05$ , \*\* $p < 0.01$ , \*\*\* $p < 0.001$ , \*\*\*\* $p < 0.0001$ . Data are shown as means  $\pm$  SEM, n = number of biological replicates. Statistical analysis was performed by paired Student's t-test.

## Figure S4

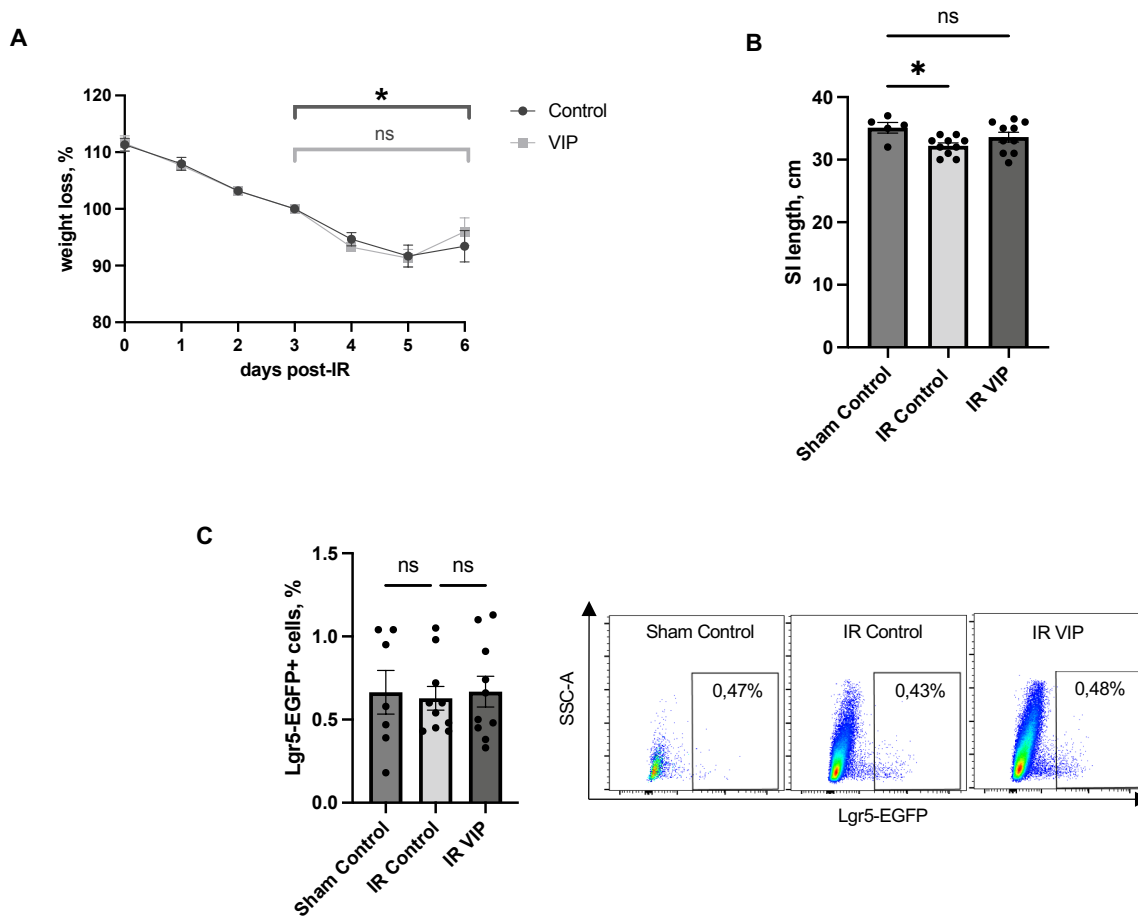

**Figure S4. VIP-mediated effects on irradiation-induced injury in mice.** **A**, Weight development of mice after abdominal irradiation. Data are normalized to the timepoint corresponding to the onset of the VIP treatment.  $n=6$  per group. **B**, Total length of the small intestine in mice after abdominal irradiation.  $n=5$  (Sham Control),  $n=10$  (IR Control; IR VIP). **C**, Flow cytometry analysis of LGR5-EGFP+ progenitor cell number in jejunal crypts of irradiated mice treated with VIP.  $n=7$  (Control, see Figure S3B),  $n=10$  (IR Control and IR VIP). \* $p < 0.05$ , \*\* $p < 0.01$ , \*\*\* $p < 0.001$ , \*\*\*\* $p < 0.0001$ . Data are shown as means  $\pm$  SEM,  $n$  = number of biological replicates. Statistical analysis was performed by unpaired Student's t-test in **(A)** and one-way ANOVA with Tukey's multiple comparisons test in **(B-C)**.

## Figure S5

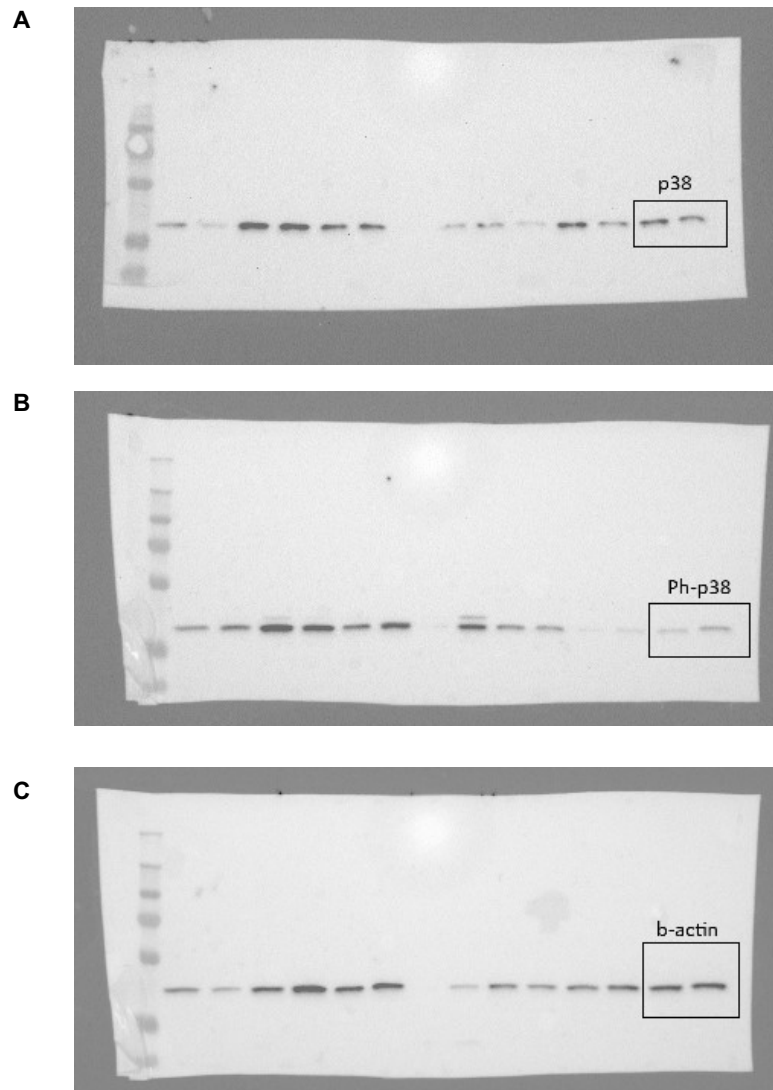

**Figure S5. Full-length Western Blots according to cropped gels shown in Figure 2C. A, p38. B, Phospho-p38. C, Beta-Actin.**

## Table S1

Table S1. Primers used for RT-qPCR analysis.

| Gene          | Primer  | Sequence                       |
|---------------|---------|--------------------------------|
| <i>Hmbs</i>   | Forward | 5'-TTGGAAACACCCTGGAAACC-3'     |
|               | Reverse | 5'-TGAATTCCTGCAGCAGCTCATCC-3'  |
| <i>Lys1</i>   | Forward | 5'-GGAATGGATGGCTACCGTGG-3'     |
|               | Reverse | 5'-CATGCCACCCATGCTCGAAT-3'     |
| <i>Muc2</i>   | Forward | 5'-AACATCTCAGGGCCGAAA-3'       |
|               | Reverse | 5'-TGCGCTTGGAGTGATAGAAA-3'     |
| <i>Clca1</i>  | Forward | 5'-GATCGCTCAGCACTCCAT-3'       |
|               | Reverse | 5'-GAGCCATTCATCCATTGGTTA-3'    |
| <i>Dclk1</i>  | Forward | 5'-AGTACATTCGGACCCTCTCTC -3'   |
|               | Reverse | 5'-CGTACCAGTCAAGGTGTGCTT-3'    |
| <i>NeuroD</i> | Forward | 5'-ATGGCGATGAAAGCGGTGTG-3'     |
|               | Reverse | 5'-TGCACTGGTACAGCCTTGTGT-3'    |
| <i>Lgr5</i>   | Forward | 5'-GACGCTGGGTTATTTCAAGTTCA-3'  |
|               | Reverse | 5'- CAGCCAGCTACCAAATAGGTGCT-3' |

## Table S2

**Table S2: Inhibitors used *in vitro***

| <b>Drug</b>      | <b>Concentration</b> | <b>Article number (Manufacturer)</b> |
|------------------|----------------------|--------------------------------------|
| SB202190         | 10 $\mu$ M           | 1264 (Tocris)                        |
| PD98059          | 20 $\mu$ M           | 1213 (Tocris)                        |
| JNK-inhibitor II | 20 $\mu$ M           | 420119 (Sigma-Aldrich)               |
| BMS-345541       | 1 $\mu$ M            | B9935 (Sigma-Aldrich)                |
| Stausporine      | 0.02 $\mu$ M         | S1421 (Selleckchem)                  |
